# Supplementary material for: Characterization and Comparison of Enterococcus spp. Isolates from Feces of Healthy Dogs and Urine of Dogs with UTIs
Source: MDPI journal article supplement (doi:10.3390/ani11102845), 2021-09-29
Supplement: s1 [file s1]

# Supplementary Material

**Table S1.** Primers of antibiotic resistance used for PCR in the study.

| Determining Resistance to | Target Gene                                                      | Sequences (5'- 3')                                            | Annealing Temperature ( °C) | Amplicon Size (bp) | References                   |
|---------------------------|------------------------------------------------------------------|---------------------------------------------------------------|-----------------------------|--------------------|------------------------------|
| Glycopeptide              | <i>vanA</i>                                                      | F: GGGAAAACGACAATTGC<br>R: GTACAATGCGGCCGTTA                  | 54                          | 732                | Dutka-Malen et al. (1995)    |
|                           | <i>vanB</i>                                                      | F: ATGGGAAGCCGATAGTC<br>R: GATTTCGTTCTCGACC                   | 54                          | 635                | Dutka-Malen et al. (1995)    |
| Penicillin                | <i>pbp4</i>                                                      | F: CAACGAAAGCCTGATGAAATGG<br>R: AATCGCCTTTTTGAGGATCGG         | 55                          | 1272               | Ono et al. (2005)            |
|                           | <i>pbp5</i>                                                      | F: AACAAAATGACAAACGGG<br>R: TATCCTTGTTATCAGGG                 | 54                          | 779                | Obeng et al. (2013)          |
| Aminoglycoside            | <i>aac(6')-Ie-aph(2'')-Ia</i> (Gentamicin)                       | F: CAGAGCCTTGGGAAGATGAAG<br>R: CCTCGTGTAATTCATGTTCTGGC        | 56                          | 348                | Vakulenko et al. (2003)      |
|                           | <i>aph(2'')-Ib</i> (Gentamicin)                                  | F: CTTGGACGCTGAGATATATGAGCAC<br>R: GTTTGTAGCAATTCAGAAACACCCTT | 56                          | 867                |                              |
|                           | <i>aph(2'')-Ic</i> (Gentamicin)                                  | F: CCACAATGATAATGACTCAGTTCCC<br>R: CCACAGCTTCCGATAGCAAGAG     | 56                          | 444                |                              |
|                           | <i>aph(2'')-Id</i> (Gentamicin)                                  | F: GTGGTTTTTACAGGAATGCCATC<br>R: CCCTCTTCATACCAATCCATATAACC   | 56                          | 641                |                              |
|                           | <i>aph(3')-IIIa</i> (Kanamycin)                                  | F: GGCTAAAATGAGAATATCACCGG<br>R: CTTTAAAAAATCATACAGCTCGCG     | 56                          | 523                |                              |
|                           | <i>ant(4')-Ia</i> (Neomycin, kanamycin, tobramycin and amikacin) | F: CAAACTGCTAAATCGGTAGAAGCC<br>R: GGAAAGTTGACCAGACATTACGAACT  | 56                          | 294                |                              |
|                           | <i>ant(6)-Ia</i> (Streptomycin)                                  | F: CGGGAGAATGGGAGACTTTG<br>R: CTGTGGCTCCACAATCTGAT            | 55                          | 563                |                              |
|                           | <i>aac(6')-Ii</i> (Gentamicin and other aminoglycosides)         | F: TGGCCGGAAGAATATGGAGA<br>R: GCATTTGGTAAGACACCTACG           | 55                          | 410                |                              |
| Tetracycline              | <i>tet(M)</i>                                                    | F: GTGGACAAAGGTACAACGAG<br>R: CGGTAAAGTTCGTACACAC             | 61                          | 406                | Malhotra-Kumar et al. (2005) |
|                           | <i>tet(L)</i>                                                    | F: TGGTGGAATGATAGCCCATT<br>R: CAGGAATGACAGCACGCTAA            | 61                          | 229                |                              |
|                           | <i>tet(O)</i>                                                    | F: AACTTAGGCATTCTGGCTCAC<br>R: TCCCACTGTTCCATATCGTCA          | 61                          | 515                |                              |
|                           | <i>tet(K)</i>                                                    | F: GATCAATTGTAGCTTTAGGTGAAGG<br>R: TTTTGTGATTACCAGGTACCATT    | 61                          | 155                |                              |

|                 |                  |                                                           |    |      |                              |
|-----------------|------------------|-----------------------------------------------------------|----|------|------------------------------|
| Macrolide       | <i>erm</i> (A)   | F: CCCGAAAAATACGCAAATTTTCAT<br>R: CCCTGTTTACCCATTTATAAACG | 61 | 590  | Malhotra-Kumar et al. (2005) |
|                 | <i>erm</i> (B)   | F: TGGTATTCCAAATGCGTAATG<br>R: CTGTGGTATGGCGGGTAAGT       | 61 | 745  | Malhotra-Kumar et al. (2005) |
|                 | <i>mef</i> (A/E) | F: CAATATGGGCAGGGCAAG<br>R: AAGCTGTTCCAATGCTACGC          | 61 | 317  | Malhotra-Kumar et al. (2005) |
|                 | <i>msr</i> (A/B) | F: GCAAATGGTGTAGGTAAGACAAC<br>R: ATCATGTGATGTAAACAAAAT    | 55 | 399  | Sutcliffe et al. (1996)      |
|                 | <i>msr</i> (C)   | F: TATAACAAACCTGCAAGTTC<br>R: CTTCAATTAGTCGATCCATA        | 52 | 410  | McDermott et al. (2005)      |
| Lincosamide     | <i>linB</i>      | F: CCTACCTATTGTTTGTGGAA<br>R: ATAACGTTACTCTCCTATTC        | 50 | 925  | Bozdogan et al. (1999)       |
| Streptogramin   | <i>vatE</i>      | F: ACTATACCTGACGCAAATGC<br>R: GGTTCAAATCTTGGTCCG          | 52 | 511  | Soltani et al. (2000)        |
|                 | <i>vatD</i>      | F: GCTCAATAGGACCAGGTGTA<br>R: TCCAGCTAACATGTATGGCG        | 55 | 271  | Soltani et al. (2000)        |
| Chloramphenicol | <i>cat</i>       | F: TAAGGTTATTGGGATAAGTTA<br>R: GCATGRTAACCATCACAWAC       | 54 | 340  | Hummel et al. (2007)         |
| <i>Int-Tn</i>   | (Tn916/Tn1545)   | F: GCGTGATTGTATCTCACT<br>R: GACGCTCCTGTTGCTTCT            | 50 | 1028 | Doherty et al. (2000)        |

## References

1. Bozdogan B., Berrezouga L., Kuo M.S., Yurek D.A., Farley K.A., Stockman B.J., Leclercq R. A new resistance gene, *linB*, conferring resistance to lincosamides by nucleotidylation in *Enterococcus faecium* HM1025. Antimicrob Agents Chemother. 1999, 43, 925-9.
2. Doherty N.K., Trzcinski P., Pickerill P., Zawadzki C., Dowson G. Genetic diversity of the *tet*(M) gene in tetracycline-resistant clonal lineages of *Streptococcus pneumoniae*. Antimicrob. Agents Chemother. 2000, 44, 2979–2984.
3. Dutka-Malen S., Evers S., Courvalin P. Detection of glycopeptide resistance genotypes and identification to the species level clinically relevant enterococci by PCR. J Clin Microbiol. 1995, 33, 24-27.
4. Hummel A.S., Hertel C., Holzapfel W.H., Franz C.M. Antibiotic resistances of starter and probiotic strains of lactic acid bacteria. Appl Environ Microbiol. 2007, 73, 730-739.
5. Kobayashi N., Alam M., Nishimoto Y., Urasawa S., Uehara N., Watanabe N. Distribution of aminoglycoside resistance genes in recent clinical isolates of *Enterococcus faecalis*, *Enterococcus faecium* and *Enterococcus avium*. Epidemiol Infect. 2001, 126, 197-204.
6. Malhotra-Kumar S., Lammens C., Piessens J., Goossens H. Multiplex PCR for simultaneous detection of macrolide and tetracycline resistance determinants in streptococci. Antimicrob Agents Chemother. 2005, 49, 4798-4800.
7. McDermott P.F., Cullen P., Hubert S.K., McDermott S.D., Bartholomew M., Simjee S., Wagner D.D. Changes in antimicrobial susceptibility of native *Enterococcus faecium* in chicken fed virginiamycin. Appl Environ Microbiol. 2005, 71, 4986-4991.
8. Obeng A.S., Rickard H., Ndi O., Sexton M., Barton M. Comparison of antimicrobial resistance patterns in enterococci from intensive and free range chickens in Australia. Avian Pathol. 2013, 42, 45-54.
9. Ono S., Muratani T., Matsumoto T. Mechanisms of resistance to imipenem and ampicillin in *Enterococcus faecalis*. Antimicrob Agents Chemother. 2005, 49, 2954–2958.

10. Soltani M., Beighton D., Philpott-Howard J., Woodford N. Mechanisms of resistance to quinupristin-dalfopristin among isolates of *Enterococcus faecium* from animals, raw meat, and hospital patients in Western Europe. *Antimicrob Agents Chemother.* 2000, 44, 433-436.
11. Sutcliffe J., Grebe T., Tait-Kamradt A., Wondrack L. Detection of erythromycin-resistant determinants by PCR. *Antimicrob Agents Chemother.* 1996, 40, 2562-2566.
12. Vakulenko S.B., Donabedian S.M., Voskresenskiy A.M., Zervos M.J., Lerner S.A., Chow J.W. Multiplex PCR for detection of aminoglycoside resistance genes in enterococci. *Antimicrob Agents Chemother.* 2003, 47, 1423-1426.

**Table S2.** Target genes and primers used in this study.

| Genes                    | Encoded Virulence Factor                                                   | Primer Sequence 5'–3'                                  | Annealing Temperature | Amplicon length (bp) | Reference                   |
|--------------------------|----------------------------------------------------------------------------|--------------------------------------------------------|-----------------------|----------------------|-----------------------------|
| <i>asa1</i>              | aggregation substance                                                      | F: GCACGCTATTACGAACATGA<br>R: TAAGAAAGAACATCACCACGA    | 56                    | 375                  | Vankerckhoven et al. (2004) |
| <i>esp</i>               | enterococcal surface protein                                               | F: AGATTTTCATCTTTGATTCTTGG<br>R: AATTGATTCTTTAGCATCTGG | 56                    | 510                  | Vankerckhoven et al. (2004) |
| <i>efaA<sub>fs</sub></i> | <i>E. faecalis</i> specific endocarditis antigen                           | F: GACAGACCCTCACGAATA<br>R: AGTTCATCATGCTGTAGTA        | 51                    | 705                  | Eaton & Gasson (2001)       |
| <i>efaA<sub>fm</sub></i> | <i>E. faecium</i> specific surface antigen                                 | F: AACAGATCCGCATGAATA<br>R: CATTTTCATCATCTGATAGTA      | 48                    | 735                  | Eaton & Gasson (2001)       |
| <i>gelE</i>              | gelatinase                                                                 | F: ACCCCGTATCATTGGTTT<br>R: ACGCATTGCTTTTCCATC         | 48                    | 419                  | Lopes et al. (2006)         |
| <i>hyl</i>               | hyaluronidase                                                              | F: ACAGAAGAGCTGCAGGAAATG<br>R: GACTGACGTCCAAGTTTCCAA   | 56                    | 276                  | Vankerckhoven et al. (2004) |
| <i>cylA</i>              | cytolysin activator                                                        | F: ACTCGGGGATTGATAGGC<br>R: GCTGCTAAAGCTGCGCTT         | 56                    | 688                  | Vankerckhoven et al. (2004) |
| <i>sgrA</i>              | serine–glutamate repeat containing protein A <i>fms2</i> or <i>orf2351</i> | F: AATGAACGGGCAAATGAG<br>R: CTTTTGTTCCTTAGTTGGTATGA    | 53                    | 671                  | Fritas et al. (2018)        |
| <i>pstD</i>              | enzyme IID subunit of a putative phosphotransferase system                 | F: TATCAACGCGATCAAAACGA<br>R: CGTTCGCATACAGCTTTTCA     | 53                    | 241                  | Fritas et al. (2018)        |
| <i>orf1481</i>           | sugar-binding protein encoded by a genomic island (8.5 kb)                 | F: GTTTATCAACATGCTAGCCCA<br>R: GCCAATGAGTTAGATGTAGCC   | 55                    | 437                  | Fritas et al. (2018)        |
| <i>IS16</i>              | <i>element IS</i>                                                          | F: CATGTTCCACGAACCAGAG<br>R: TCAAAAAGTGGGCTTGGC        | 55                    | 547                  | Fritas et al. (2018)        |

## References

1. Eaton T.J., Gasson M.J. Molecular screening of *Enterococcus* virulence determinants and potential for genetic exchange between food and medical isolates. *Appl Environ Microbiol.* 2001, 67, 1628-1635.
2. Freitas A.R, Tedim A.P, Novais C., Coque T.M., Peixe L. Distribution of putative virulence markers in *Enterococcus faecium*: towards a safety profile review. *J Antimicrob Chemother.* 2018, 73, 306-319.
3. Lopes Mde F., Simões A.P., Tenreiro R., Marques J.J., Crespo M.T. Activity and expression of a virulence factor, gelatinase, in dairy enterococci. *Int J Food Microbiol.* 2006, 112, 208-214.
4. Vankerckhoven V., Van Autgaerden T., Vael C., Lammens C., Chapelle S., Rossi R., Jabes D., Goossens H. Development of a multiplex PCR for the detection of *asa1*, *gelE*, *cylA*, *esp*, and *hyl* genes in enterococci and survey for virulence determinants among European hospital isolates of *Enterococcus faecium*. *J Clin Microbiol.* 2004, 42, 4473-4479.

**Table S3.** Origin, species, phenotypic and genotypic profile of each *Enterococcus* spp. isolates tested.

| Strain | Source | Species            | Resistance pattern | MIC Ampi | HLSR | HLGR | Phenotypic resistance profiles                    | Genotypic resistance profiles                                     | Biofilm production | Virulence profile                |
|--------|--------|--------------------|--------------------|----------|------|------|---------------------------------------------------|-------------------------------------------------------------------|--------------------|----------------------------------|
| E244   | Stools | <i>E. faecalis</i> | MDR                | 32       | -    | +    | RD C W N CN S CIP ENR E QD<br>DA OX AMP TE TIG    | <i>pbp4 tet(M) erm(B) aph(3')-IIIa cat Int-Tn</i>                 | MBP                | <i>asa1 efaAfs cylA esp</i>      |
| E54    | Stools | <i>E. faecalis</i> | MDR                | /        | +    | +    | N CN S E QD DA OX TE                              | <i>pbp4 tet(M) lnuB erm(B) aph(3')-IIIa ant(6')-Ia Int-Tn</i>     | SBP                | <i>gelE asa1 efaAfs cylA esp</i> |
| E53    | Stools | <i>E. faecalis</i> | MDR                | /        | +    | +    | C F W N CN S E QD DA OX TE                        | <i>pbp4 tet(M) lnuB erm(B) aph(3')-IIIa ant(6')-Ia cat Int-Tn</i> | SBP                | <i>asa1 efaAfs cylA esp</i>      |
| E220   | Stools | <i>E. faecalis</i> | MDR                | /        | +    | +    | RD C LZD W N CN S KF CIP ENR<br>E QD DA OX TE TIG | <i>pbp4 tet(M) lnuB erm(B) aph(3')-IIIa ant(6')-Ia Int-Tn</i>     | SBP                | <i>asa1 efaAfs cylA esp</i>      |
| E234   | Stools | <i>E. faecalis</i> | XDR                | /        | +    | +    | RD C LZD W N CN S KF CIP TEC<br>E QD DA OX TE TIG | <i>tet(M) tet(L) erm(B) aph(3')-IIIa cat</i>                      | WBP                | <i>gelE efaAfs</i>               |
| E121   | Stools | <i>E. faecalis</i> | MDR                | /        | +    | +    | C LZD W N CN S CIP ENR E QD<br>DA OX TE           | <i>pbp4 tet(M) tet(L) lnuB erm(B) aph(3')-IIIa ant(6')-Ia cat</i> | SBP                | <i>gelE efaAfs</i>               |
| E165   | Stools | <i>E. faecalis</i> | MDR                | /        | -    | +    | C LZD F W N CN S CIP ENR QD<br>DA TE TIG          | <i>tet(M) erm(B) Int-Tn</i>                                       | SBP                | <i>asa1 efaAfs cylA esp</i>      |
| E188   | Stools | <i>E. faecalis</i> | MDR                | /        | +    | -    | RD C LZD W N CN S ENR E QD<br>DA OX TE            | <i>pbp4 tet(M) aph(3')-IIIa Int-Tn</i>                            | MBP                | <i>asa1 efaAfs</i>               |
| E232   | Stools | <i>E. faecalis</i> | MDR                | /        | +    | +    | RD C LZD W N CN S ENR E QD<br>DA OX TE TIG        | <i>pbp4 tet(M) lnuB aph(3')-IIIa ant(6')-Ia Int-Tn</i>            | SBP                | <i>gelE asa1 efaAfs cylA esp</i> |
| E270   | Stools | <i>E. faecalis</i> | MDR                | /        | +    | -    | LZD N CN S QD DA OX TE                            | <i>pbp4 tet(M) aph(3')-IIIa ant(6')-Ia Int-Tn</i>                 | SBP                | <i>gelE asa1 efaAfs cylA esp</i> |
| E218   | Stools | <i>E. faecalis</i> | XDR                | /        | +    | -    | RD C LZD W N CN S KF CIP ENR<br>E QD DA OX TE TIG | <i>pbp4 tet(M) lnuB aph(3')-IIIa ant(6')-Ia Int-Tn</i>            | SBP                | <i>asa1 efaAfs cylA esp</i>      |
| E119   | Stools | <i>E. faecalis</i> | MDR                | /        | +    | +    | RD C LZD W N CN S CIP ENR E<br>QD DA OX TE TIG    | <i>pbp4 tet(M) tet(L) lnuB erm(B) aph(3')-IIIa ant(6')-Ia cat</i> | MBP                | <i>gelE efaAfs</i>               |
| E233   | Stools | <i>E. faecalis</i> | XDR                | 128      | +    | -    | RD LZD W N CN S KF CIP QD<br>DA OX AMP TE TIG     | <i>pbp4 tet(M) aph(3')-IIIa ant(6')-Ia</i>                        | SBP                | <i>gelE asa1 efaAfs cylA esp</i> |
| E52    | Stools | <i>E. faecalis</i> | MDR                | /        | +    | +    | N S QD DA OX TE                                   | <i>pbp4 tet(M) Int-Tn</i>                                         | SBP                | <i>gelE efaAfs esp</i>           |
| 1079B  | UTI    | <i>E. faecalis</i> | MDR                | /        | -    | -    | RD N CN S KF CIP ENR QD DA<br>OX                  | <i>pbp4</i>                                                       | MBP                | <i>gelE efaAfs</i>               |
| 654    | UTI    | <i>E. faecalis</i> | MDR                | 32       | -    | -    | W S QD DA OX TE                                   | <i>pbp4 tet(M) Int-Tn</i>                                         | SBP                | <i>gelE asa1 efaAfs cylA</i>     |
| 1091   | UTI    | <i>E. faecalis</i> | MDR                | >256     | -    | -    | RD N CN S KF CIP ENR QD DA<br>OX AMP TE           | <i>tet(M)</i>                                                     | MBP                | <i>gelE efaAfs</i>               |
| 793    | UTI    | <i>E. faecalis</i> | MDR                | 64       | +    | -    | RD C N S CIP ENR E QD DA OX<br>TE                 | <i>pbp4 tet(M) tet(L) erm(B) aph(3')-IIIa cat Int-Tn</i>          | WBP                | <i>gelE asa1 efaAfs</i>          |
| 1079   | UTI    | <i>E. faecalis</i> | MDR                | 64       | -    | -    | RD N CN S KF CIP ENR QD DA<br>OX AMP              | <i>pbp4</i>                                                       | SBP                | <i>gelE efaAfs</i>               |

|      |        |                    |     |      |   |   |                                                |                                                                                                    |     |                                      |
|------|--------|--------------------|-----|------|---|---|------------------------------------------------|----------------------------------------------------------------------------------------------------|-----|--------------------------------------|
| 46   | UTI    | <i>E. faecalis</i> | MDR | 8    | + | - | C W N CN S KF QD DA OX TE                      | <i>pbp4 tet(M) cat Int-Tn</i>                                                                      | SBP | <i>asa1 efaAfs cyla</i>              |
| 835C | UTI    | <i>E. faecalis</i> | MDR | >256 | - | - | N CN S KF CIP ENR E QD DA OX<br>TE             | <i>pbp4 tet(M) tet(L) erm(B) Int-Tn</i>                                                            | SBP | <i>gelE asa1 efaAfs</i>              |
| 568  | UTI    | <i>E. faecalis</i> | MDR | 16   | + | - | C W N CN S KF CIP ENR E QD<br>DA OX TE         | <i>pbp4 tet(M) tet(L) lnuB erm(B)<br/>aph(3')-IIIa ant(6')-Ia cat Int-Tn</i>                       | SBP | <i>asa1 efaAfs cyla esp</i>          |
| 260  | UTI    | <i>E. faecalis</i> | MDR | >256 | + | - | N CN S KF CIP ENR QD DA OX                     | <i>pbp4</i>                                                                                        | MBP | <i>gelE efaAfs</i>                   |
| 323  | UTI    | <i>E. faecalis</i> | MDR | /    | - | - | W N CN S E QD DA OX TE                         | <i>pbp4 tet(M) Int-Tn</i>                                                                          | SBP | <i>asa1 efaAfs cyla esp</i>          |
| 324  | UTI    | <i>E. faecalis</i> | MDR | /    | - | - | W N CN S KF QD DA OX                           | <i>pbp4</i>                                                                                        | WBP | <i>gelE asa1 efaAfs</i>              |
| 320  | UTI    | <i>E. faecalis</i> | MDR | 32   | - | - | RD N CN S CIP ENR E QD DA OX                   | <i>pbp4 erm(B)</i>                                                                                 | MBP | <i>gelE asa1 efaAfs</i>              |
| 359  | UTI    | <i>E. faecalis</i> | MDR | 32   | - | - | RD W N CN S KF E QD DA OX TE                   | <i>pbp4 tet(M) Int-Tn</i>                                                                          | SBP | <i>asa1 efaAfs cyla esp</i>          |
| 357B | UTI    | <i>E. faecalis</i> | MDR | 32   | - | - | N CN S KF CIP ENR E QD DA OX<br>AMC AMP TE     | <i>pbp4 erm(B)</i>                                                                                 | MBP | <i>gelE asa1 efaAfs</i>              |
| 415  | UTI    | <i>E. faecalis</i> | MDR | 16   | - | - | W N CN S KF E QD OX AMC<br>AMP TE              | <i>pbp4 tet(M) Int-Tn</i>                                                                          | SBP | <i>asa1 efaAfs cyla esp</i>          |
| 447  | UTI    | <i>E. faecalis</i> | MDR | >256 | - | - | F W S KF CIP ENR E QD DA OX<br>AMC AMP TE      | <i>pbp4 tet(M) Int-Tn</i>                                                                          | WBP | <i>asa1 efaAfs cyla esp</i>          |
| E227 | Stools | <i>E. faecium</i>  | MDR | 128  | - | - | RD LZD F W N CN S E DA OX<br>AMP               | <i>pbp5 tet(M) lnuB erm(B) ) mrs(A/B)<br/>mrs(C) aph(3')-IIIa ant(6')-Ia<br/>aac(6')-Ii Int-Tn</i> | WBP | <i>asa1 efaAfm cyla esp</i>          |
| E260 | Stools | <i>E. faecium</i>  | MDR | >256 | - | - | F W N S KF CIP ENR QD OX AMP<br>TE             | <i>tet(M) mrs(A/B) mrs(C) aph(3')-IIIa<br/>ant(6')-Ia aac(6')-Ii Int-Tn</i>                        | WBP | <i>gelE asa1 efaAfm<br/>cyla esp</i> |
| E169 | Stools | <i>E. faecium</i>  | MDR | 64   | - | - | RD C LZD F W N CN S KF CIP<br>ENR QD OX TE TIG | <i>tet(M) mrs(A/B) mrs(C) aac(6')-Ii</i>                                                           | WBP | <i>efaAfm IS16</i>                   |
| E153 | Stools | <i>E. faecium</i>  | MDR | 64   | - | - | RD C LZD F W N S KF CIP ENR E<br>OX AMP TE TIG | <i>tet(M) tet(L) mrs(A/B) mrs(C)<br/>aac(6')-Ii</i>                                                | WBP | <i>efaAfm IS16</i>                   |
| E251 | Stools | <i>E. faecium</i>  | MDR | 256  | - | - | LZD F W N S KF CIP ENR E DA<br>OX AMP          | <i>pbp5 mrs(A/B) mrs(C) aac(6')-Ii</i>                                                             | WBP | <i>efaAfm sgrA</i>                   |
| E236 | Stools | <i>E. faecium</i>  | MDR | >256 | - | - | RD W S KF ENR OX AMP                           | <i>mrs(A/B) mrs(C) aac(6')-Ii</i>                                                                  | WBP | <i>gelE efaAfm</i>                   |
| E239 | Stools | <i>E. faecium</i>  | XDR | 128  | - | - | C LZD F W N CN S KF CIP QD<br>OX AMP TE        | <i>tet(M) mrs(A/B) mrs(C) aac(6')-Ii<br/>Int-Tn</i>                                                | WBP | <i>efaAfm IS16</i>                   |
| E160 | Stools | <i>E. faecium</i>  | XDR | 16   | - | - | RD C LZD F W N CN S KF CIP<br>ENR QD OX AMP TE | <i>tet(M) mrs(A/B) mrs(C) aac(6')-Ii<br/>Int-Tn</i>                                                | WBP | <i>efaAfm</i>                        |
| E257 | Stools | <i>E. faecium</i>  | MDR | 128  | - | - | LZD N KF CIP ENR QD DA OX<br>AMP TIG           | <i>mrs(A/B) mrs(C) aac(6')-Ii</i>                                                                  | WBP | <i>efaAfm IS16</i>                   |
| E177 | Stools | <i>E. faecium</i>  | XDR | 32   | - | - | LZD F W N CN S KF CIP ENR<br>TEC OX AMP TE TIG | <i>tet(M) mrs(A/B) mrs(C) aac(6')-Ii<br/>Int-Tn</i>                                                | WBP | <i>efaAfm IS16</i>                   |

|             |        |                      |     |      |   |   |                                                     |                                                                                                        |     |                                                        |
|-------------|--------|----------------------|-----|------|---|---|-----------------------------------------------------|--------------------------------------------------------------------------------------------------------|-----|--------------------------------------------------------|
| <b>E99</b>  | Stools | <i>E.faecium</i>     | MDR | >256 | + | - | F W N CN S KF E DA OX AMP TE<br>TIG                 | <i>tet(M) tet(L) lnuB erm(B) mrs(A/B)<br/>mrs(C) aac(6')-Ie-aph(2'')-Ia ant(6')-<br/>Ia aac(6')-Ii</i> | WBP | <i>efaAfm IS16</i>                                     |
| <b>E254</b> | Stools | <i>E.faecium</i>     | MDR | >256 | + | - | C LZD W N CN S KF CIP ENR E<br>DA OX AMC AMP TE TIG | <i>tet(L) lnuB erm(B) mrs(A/B) mrs(C)<br/>mef(A/E)<br/>aph(3')-IIIa ant(6')-Ia aac(6')-Ii</i>          | WBP | <i>efaAfm sgrA pstD<br/>orf1481 IS16</i>               |
| <b>E241</b> | Stools | <i>E.faecium</i>     | /   | 256  | - | - | RD N S KF DA OX AMP                                 | <i>pbp5 mrs(A/B) mrs(C) aac(6')-Ii</i>                                                                 | WBP | <i>efaAfm</i>                                          |
| <b>E238</b> | Stools | <i>E.faecium</i>     | MDR | >256 | - | - | C LZD F W N S KF OX AMP TE<br>TIG                   | <i>mrs(A/B) mrs(C) aac(6')-Ii</i>                                                                      | WBP | <i>efaAfm</i>                                          |
| <b>E154</b> | Stools | <i>E.faecium</i>     | MDR | 64   | - | - | RD LZD F N S CIP ENR E DA OX<br>AMP TE              | <i>mrs(A/B) mrs(C) aac(6')-Ii</i>                                                                      | WBP | <i>efaAfm</i>                                          |
| <b>24A</b>  | UTI    | <i>E. faecium</i>    | MDR | >256 | - | + | C N CN S KF CIP ENR E QD DA<br>OX AMC AMP TE        | <i>tet(M) tet(L) mrs(A/B) mrs(C)<br/>ant(6')-Ia aac(6')-Ii cat Int-Tn</i>                              | MBP | <i>asa1 efaAfm cylA<br/>sgrA pstD orf1481<br/>IS16</i> |
| <b>1118</b> | UTI    | <i>E.faecium</i>     | MDR | >256 | + | + | W N CN S KF CIP ENR E DA OX<br>AMC AMP TE           | <i>erm(B) mrs(A/B) mrs(C) aac(6')-Ie-<br/>aph(2'')-Ia<br/>aph(3')-IIIa ant(6')-Ia aac(6')-Ii</i>       | WBP | <i>efaAfm sgrA pstD<br/>orf1481 IS16</i>               |
| <b>399</b>  | UTI    | <i>E.faecium</i>     | MDR | /    | - | - | S KF CIP ENR QD DA OX                               | <i>mrs(A/B) mrs(C) aac(6')-Ii</i>                                                                      | WBP | <i>efaAfm orf1481</i>                                  |
| <b>618</b>  | UTI    | <i>E. gallinarum</i> | MDR | >256 | + | + | RD CIP ENR QD DA OX TE                              | <i>tet(M) erm(B) aph(3')-IIIa cat Int-Tn</i>                                                           | MBP | <i>gelE asa1</i>                                       |
| <b>556B</b> | UTI    | <i>E. gallinarum</i> | MDR | <8   | - | - | N S CIP ENR E QD DA OX TE                           | <i>tet(M) Int-Tn</i>                                                                                   | MBP | <i>asa1</i>                                            |
| <b>1034</b> | UTI    | <i>E. gallinarum</i> | MDR | 64   | + | - | N S KF CIP ENR E QD DA OX<br>AMP TE                 | <i>tet(M) aph(3')-IIIa ant(6')-Ia Int-Tn</i>                                                           | SBP | <i>esp</i>                                             |

Legend: Stools = isolate from healthy dog stools; UTI = isolate from sick dog urines; AMPI = Minimum Inhibitory Concentration (MIC) for ampicillin expressed in µg/ml; HLSR = High Level Streptomycin Resistance; HLGR = High Level Gentamicin Resistance; RD = rifampicin; C = chloramphenicol; LZD = linezolid; F = nitrofurantoin; W = trimethoprim; N = neomycin; CN = gentamicin; S = streptomycin; KF = cephalothin; CIP = ciprofloxacin; ENR = enrofloxacin; TEC = teicoplanin; E = erythromycin; QD = quinupristin-dalfopristin; DA = clindamycin; OX = oxacillin; AMC = amoxicillin-clavulanic acid; AMP = ampicillin; TE = tetracycline; TIG = tigecycline; WBP = Weak Biofilm Producer; MBP = Moderate Biofilm Producer; SBP = Strong Biofilm Producer.
